# Supplementary material for: Expanded genetic testing of GIST patients identifies high proportion of non-syndromic patients with germline alterations
Source: PubMed Central journal article supplement (PMC9807588; doi:10.1038/s41698-022-00342-z), 2023-01-02
Supplement: 41698_2022_342_MOESM2_ESM.pdf [file 41698_2022_342_MOESM2_ESM.pdf]

## Reporting Summary

Nature Portfolio wishes to improve the reproducibility of the work that we publish. This form provides structure for consistency and transparency in reporting. For further information on Nature Portfolio policies, see our [Editorial Policies](#) and the [Editorial Policy Checklist](#).

### Statistics

For all statistical analyses, confirm that the following items are present in the figure legend, table legend, main text, or Methods section.

- | n/a                                 | Confirmed                                                                                                                                                                                                                                                                                      |
|-------------------------------------|------------------------------------------------------------------------------------------------------------------------------------------------------------------------------------------------------------------------------------------------------------------------------------------------|
| <input type="checkbox"/>            | <input checked="" type="checkbox"/> The exact sample size ( $n$ ) for each experimental group/condition, given as a discrete number and unit of measurement                                                                                                                                    |
| <input checked="" type="checkbox"/> | <input type="checkbox"/> A statement on whether measurements were taken from distinct samples or whether the same sample was measured repeatedly                                                                                                                                               |
| <input type="checkbox"/>            | <input checked="" type="checkbox"/> The statistical test(s) used AND whether they are one- or two-sided<br><i>Only common tests should be described solely by name; describe more complex techniques in the Methods section.</i>                                                               |
| <input type="checkbox"/>            | <input checked="" type="checkbox"/> A description of all covariates tested                                                                                                                                                                                                                     |
| <input checked="" type="checkbox"/> | <input type="checkbox"/> A description of any assumptions or corrections, such as tests of normality and adjustment for multiple comparisons                                                                                                                                                   |
| <input type="checkbox"/>            | <input checked="" type="checkbox"/> A full description of the statistical parameters including central tendency (e.g. means) or other basic estimates (e.g. regression coefficient) AND variation (e.g. standard deviation) or associated estimates of uncertainty (e.g. confidence intervals) |
| <input type="checkbox"/>            | <input checked="" type="checkbox"/> For null hypothesis testing, the test statistic (e.g. $F$ , $t$ , $r$ ) with confidence intervals, effect sizes, degrees of freedom and $P$ value noted<br><i>Give <math>P</math> values as exact values whenever suitable.</i>                            |
| <input checked="" type="checkbox"/> | <input type="checkbox"/> For Bayesian analysis, information on the choice of priors and Markov chain Monte Carlo settings                                                                                                                                                                      |
| <input checked="" type="checkbox"/> | <input type="checkbox"/> For hierarchical and complex designs, identification of the appropriate level for tests and full reporting of outcomes                                                                                                                                                |
| <input type="checkbox"/>            | <input checked="" type="checkbox"/> Estimates of effect sizes (e.g. Cohen's $d$ , Pearson's $r$ ), indicating how they were calculated                                                                                                                                                         |

*Our web collection on [statistics for biologists](#) contains articles on many of the points above.*

### Software and code

Policy information about [availability of computer code](#)

- |                 |                                                                                                                                                                                                                                                                                                                                                                                                                   |
|-----------------|-------------------------------------------------------------------------------------------------------------------------------------------------------------------------------------------------------------------------------------------------------------------------------------------------------------------------------------------------------------------------------------------------------------------|
| Data collection | Our patient cohort received MSK-IMPACT paired tumor-blood DNA sequencing testing. The MSK-IMPACT data analysis pipeline is available at <a href="https://github.com/rhshah/IMPACT-Pipeline">https://github.com/rhshah/IMPACT-Pipeline</a> . The mutational signature decomposition code is available at <a href="https://github.com/mskcc/mutation-signatures">https://github.com/mskcc/mutation-signatures</a> . |
| Data analysis   | All de-identified tumor DNA sequencing results and associated clinical data for the patients in this study are publicly available in the open-source cBioPortal for Cancer Genomics at <a href="https://www.cbioportal.org/study/summary?id=gist_msk_2022">https://www.cbioportal.org/study/summary?id=gist_msk_2022</a> .                                                                                        |

For manuscripts utilizing custom algorithms or software that are central to the research but not yet described in published literature, software must be made available to editors and reviewers. We strongly encourage code deposition in a community repository (e.g. GitHub). See the Nature Portfolio [guidelines for submitting code & software](#) for further information.

## Data

Policy information about [availability of data](#)

All manuscripts must include a [data availability statement](#). This statement should provide the following information, where applicable:

- Accession codes, unique identifiers, or web links for publicly available datasets
- A description of any restrictions on data availability
- For clinical datasets or third party data, please ensure that the statement adheres to our [policy](#)

Identifying information for the patients is not available to protect patient privacy. All de-identified tumor DNA sequencing results and associated clinical data for the patients in this study are publicly available in the open-source cBioPortal for Cancer Genomics at [https://www.cbioportal.org/study/summary?id=gist\\_msk\\_2022](https://www.cbioportal.org/study/summary?id=gist_msk_2022).

## Human research participants

Policy information about [studies involving human research participants and Sex and Gender in Research](#).

Reporting on sex and gender

Sex of the participants have been described in Supplementary Table 2.

Population characteristics

Age at diagnosis, genotypic information and tumor characteristics have been described in Supplementary Table 2.

Recruitment

Patients were ascertained through their treating physicians and referral was at the discretion of the physicians.

Ethics oversight

All patients provided written informed consent for testing under a Memorial Sloan Kettering Cancer Center Institutional Review Board (IRB)-approved protocol (IRB#12-245).

Note that full information on the approval of the study protocol must also be provided in the manuscript.

## Field-specific reporting

Please select the one below that is the best fit for your research. If you are not sure, read the appropriate sections before making your selection.

Life sciences  Behavioural & social sciences  Ecological, evolutionary & environmental sciences

For a reference copy of the document with all sections, see [nature.com/documents/nr-reporting-summary-flat.pdf](https://www.nature.com/documents/nr-reporting-summary-flat.pdf)

## Life sciences study design

All studies must disclose on these points even when the disclosure is negative.

Sample size

The de-identified cohort consisted of tumor-normal pairs from 499 consecutive patients with GIST who were treated at MSKCC and had MSK-IMPACT. Germline analysis cohort consisted of 103 patients with GIST, who were a subset of the larger cohort and prospectively consented to germline analysis as part of MSK-IMPACT.

Data exclusions

No data was excluded from analysis.

Replication

Tumor-normal sequencing results were analyzed in a paired manner and the matching of both samples from the same patient was confirmed by comparison of the sequencing data.

Randomization

All participants in our study received MSK-IMPACT paired tumor-normal sequencing without randomization.

Blinding

The tumor sequencing results analyses were performed on 499 de-identified tumor-normal pairs and the investigators did not know the identity of the patients. For the germline analysis cohort of 103 patients with GISTs, results were analyzed in an identified manner and de-identification was not possible, because the clinical germline genetic testing results were reported and returned to the patients.

## Reporting for specific materials, systems and methods

We require information from authors about some types of materials, experimental systems and methods used in many studies. Here, indicate whether each material, system or method listed is relevant to your study. If you are not sure if a list item applies to your research, read the appropriate section before selecting a response.

## Materials &amp; experimental systems

|                                     |                                                        |
|-------------------------------------|--------------------------------------------------------|
| n/a                                 | Involvement in the study                               |
| <input type="checkbox"/>            | <input checked="" type="checkbox"/> Antibodies         |
| <input checked="" type="checkbox"/> | <input type="checkbox"/> Eukaryotic cell lines         |
| <input checked="" type="checkbox"/> | <input type="checkbox"/> Palaeontology and archaeology |
| <input checked="" type="checkbox"/> | <input type="checkbox"/> Animals and other organisms   |
| <input type="checkbox"/>            | <input checked="" type="checkbox"/> Clinical data      |
| <input checked="" type="checkbox"/> | <input type="checkbox"/> Dual use research of concern  |

## Methods

|                                     |                                                 |
|-------------------------------------|-------------------------------------------------|
| n/a                                 | Involvement in the study                        |
| <input checked="" type="checkbox"/> | <input type="checkbox"/> ChIP-seq               |
| <input checked="" type="checkbox"/> | <input type="checkbox"/> Flow cytometry         |
| <input checked="" type="checkbox"/> | <input type="checkbox"/> MRI-based neuroimaging |

## Antibodies

|                 |                                                                                                                                                                                                                                                                                                          |
|-----------------|----------------------------------------------------------------------------------------------------------------------------------------------------------------------------------------------------------------------------------------------------------------------------------------------------------|
| Antibodies used | Immunohistochemistry for SDHA and SDHB proteins was performed as part of clinical assessment of tumors on formalin-fixed, paraffin-embedded tissue sections using AB14715 (Abcam, Cambridge MA, USA) and HPA002868 (Sigma-Aldrich, St. Louis, MO, USA) antibodies, respectively.                         |
| Validation      | AB14715 : <a href="https://www.abcam.com/sdha-antibody-2e3gc12fb2ae2-ab14715.html">https://www.abcam.com/sdha-antibody-2e3gc12fb2ae2-ab14715.html</a> ; HPA002868: <a href="https://www.sigmaaldrich.com/US/en/product/sigma/hpa002868">https://www.sigmaaldrich.com/US/en/product/sigma/hpa002868</a> . |

## Clinical data

Policy information about [clinical studies](#)

All manuscripts should comply with the ICMJE [guidelines for publication of clinical research](#) and a completed [CONSORT checklist](#) must be included with all submissions.

|                             |                                                                                                                                                                                                                                                                                                                                                                                                                                                                                                                                                                                                                                                                               |
|-----------------------------|-------------------------------------------------------------------------------------------------------------------------------------------------------------------------------------------------------------------------------------------------------------------------------------------------------------------------------------------------------------------------------------------------------------------------------------------------------------------------------------------------------------------------------------------------------------------------------------------------------------------------------------------------------------------------------|
| Clinical trial registration | MSK-IMPACT (ClinicalTrials.gov identifier, NCT01775072)                                                                                                                                                                                                                                                                                                                                                                                                                                                                                                                                                                                                                       |
| Study protocol              | <a href="https://clinicaltrials.gov/ct2/show/NCT01775072">https://clinicaltrials.gov/ct2/show/NCT01775072</a>                                                                                                                                                                                                                                                                                                                                                                                                                                                                                                                                                                 |
| Data collection             | The de-identified cohort consisted of tumor-normal pairs from 499 consecutive patients with GIST who were treated at MSKCC and had MSK-IMPACT (ClinicalTrials.gov identifier, NCT01775072) paired tumor-blood DNA sequencing test between April 2015 and June 2021.                                                                                                                                                                                                                                                                                                                                                                                                           |
| Outcomes                    | To assess whether expanded genetic testing of unselected GIST patients could identify individuals with hereditary predisposition, we analyzed matched tumor-germline sequencing results of MSK-IMPACT from 103 patients with GISTs treated at Memorial Sloan Kettering (MSK) Cancer Center (MSKCC) over a 6-year period. To determine the frequency of somatic versus germline variants identified in tumor-only sequencing of GISTs, we analyzed a cohort of de-identified 499 GISTs that received paired tumor-normal sequencing using MSK-IMPACT, including tumors from the 103 patients in the initial analysis and 396 patients who did not consent to germline testing. |
